# Supplementary material
Source: Research Square preprint supplement (doi:10.21203/rs.3.rs-9874962/v1)
Supplement: Supplementary file 3 [file 6ae8314f8aa5e9942555350f.pdf]

# Supplementary Information

## KnowMol: A Knowledge-Guided Multi-Agent Framework for Interpretable Drug-Target Interaction Prediction, Validated in PRMT3-Targeted NAFLD Therapy

May 31, 2026

**Shujie Li**<sup>1</sup>, **Kexi Liao**<sup>2</sup>, **Chunhua Ma**<sup>3</sup>, Rui Guo<sup>2</sup>, Minghuan Tan<sup>6</sup>, Jialu Yuan<sup>4</sup>, Lei Chen<sup>1</sup>, Jinfeng Xu<sup>1</sup>, Xiping Hu<sup>4</sup>, Hamid Alinejad-Rokny<sup>5</sup>, Chengming Li<sup>4</sup>, Edith Ngai<sup>1</sup>, Shuguo Zheng<sup>2</sup>, Min Yang<sup>6</sup>

<sup>1</sup> HKU IoT Lab, The University of Hong Kong, Hong Kong

<sup>2</sup> Institute of Hepatobiliary Surgery, First Affiliated Hospital, Army Medical University, Gaotanyan Road 30, Shapingba District, Chongqing 400038, China

<sup>3</sup> Chongqing Health Center for Women and Children, No. 74 Jintang Street, Yuzhong District, Chongqing 400012, China

<sup>4</sup> Shenzhen MSU-BIT University, Shenzhen, China

<sup>5</sup> School of Biomedical Engineering, UNSW Sydney, Sydney NSW 2052, Australia

<sup>6</sup> Shenzhen Key Laboratory for High Performance Data Mining, Shenzhen Institutes of Advanced Technology, Chinese Academy of Sciences, Shenzhen, China

### Correspondence to:

Min Yang

Email: [min.yang@siat.ac.cn](mailto:min.yang@siat.ac.cn)

Kexi Liao

Email: [lkx@tmmu.edu.cn](mailto:lkx@tmmu.edu.cn)

Shuguo Zheng

Email: [shuguoZh@tmmu.edu.cn](mailto:shuguoZh@tmmu.edu.cn)

Chengming Li

Email: [licm@smbu.edu.cn](mailto:licm@smbu.edu.cn)

Edith Ngai

Email: [chngai@eee.hku.hk](mailto:chngai@eee.hku.hk)

## 1 Supplementary Tables

Table S1 | Comparison results of the model performance on DrugBank

| DrugBank       | Accuracy (std)      | Recall (std)        | Precision (std)    | MCC (std)           | F1 score (std)     | AUC (std)           | AUPR (std)          |
|----------------|---------------------|---------------------|--------------------|---------------------|--------------------|---------------------|---------------------|
| RF             | 71.07 (1.34)        | 73.08 (0.95)        | 76.92 (1.42)       | 51.23 (1.54)        | 74.94 (0.92)       | 83.03 (0.65)        | 84.78 (0.67)        |
| NB             | 52.90 (1.13)        | <u>87.99 (1.77)</u> | 51.71 (1.01)       | 42.34 (3.24)        | 65.13 (0.89)       | 60.76 (1.24)        | 59.37 (1.77)        |
| SVM            | 78.02 (1.92)        | <u>75.04 (2.93)</u> | 73.86 (2.14)       | 53.87 (1.29)        | 74.39 (1.40)       | 82.02 (1.62)        | 82.85 (1.49)        |
| DeepConv-DTI   | 79.50 (0.22)        | 80.45 (0.21)        | 79.30 (0.64)       | 57.91 (0.61)        | 79.87 (0.62)       | 86.69 (0.22)        | 86.28 (0.13)        |
| GraphDTA       | 77.69 (0.11)        | 78.77 (1.13)        | 76.92 (1.05)       | 55.41 (0.63)        | 77.83 (1.18)       | 83.62 (0.25)        | 83.26 (0.18)        |
| MolTrans       | 78.48 (0.17)        | 81.97 (0.23)        | 77.01 (0.35)       | 55.65 (0.62)        | 79.41 (0.73)       | 85.98 (0.64)        | 86.67 (0.12)        |
| HyperAttention | 80.85 (0.23)        | <b>88.16 (0.15)</b> | 77.09 (0.17)       | 62.32 (0.42)        | 82.26 (0.33)       | 89.94 (0.14)        | 88.95 (0.15)        |
| TransformerCPI | 79.01 (0.24)        | 76.26 (0.36)        | 80.47 (0.34)       | 58.09 (0.22)        | 78.31 (0.38)       | 84.62 (0.33)        | 84.23 (0.28)        |
| GraphormerDTI  | 80.22 (1.07)        | 82.05 (1.23)        | 79.11 (0.91)       | 60.48 (2.16)        | 80.55 (1.02)       | 88.63 (1.02)        | 88.36 (0.99)        |
| AIGO-DTI       | 81.88 (1.37)        | 82.28 (2.69)        | 81.26 (0.36)       | 63.80 (2.78)        | 81.74 (1.40)       | 88.62 (1.02)        | 88.44 (1.65)        |
| DLM-DTI        | <u>82.13 (0.27)</u> | 82.54 (1.91)        | 81.68 (1.56)       | <u>66.32 (0.55)</u> | 81.08 (0.56)       | <u>90.48 (0.48)</u> | <u>90.20 (0.60)</u> |
| EviDTI         | 82.02 (0.43)        | 82.28 (1.03)        | 81.90 (0.58)       | 64.29 (1.05)        | 82.09 (0.74)       | 88.87 (0.73)        | 88.45 (1.51)        |
| KnowMol        | <b>87.33(0.53)</b>  | 82.58(1.23)         | <b>90.80(0.42)</b> | <b>74.91(0.63)</b>  | <b>86.50(0.59)</b> | <b>93.73(0.47)</b>  | <b>94.60(0.83)</b>  |

The best results are highlighted in bold, while the second-best results are underlined. Five independent replications of each method were performed ( $n = 5$ ). Data are expressed as means (std).

Table S2 | Comparison results of the model performance on KIBA

| KIBA           | Accuracy (std)      | Recall (std)        | Precision (std)    | MCC (std)           | F1 score (std)      | AUC (std)          | AUPR (std)         |
|----------------|---------------------|---------------------|--------------------|---------------------|---------------------|--------------------|--------------------|
| RF             | 88.41 (0.34)        | 64.84 (2.48)        | 70.57 (2.30)       | 63.21 (1.67)        | 67.59 (1.37)        | 91.05 (0.38)       | 76.05 (1.04)       |
| NB             | 52.92 (0.83)        | 71.72 (1.77)        | 24.22 (1.40)       | 24.56 (3.24)        | 36.21 (1.47)        | 65.92 (0.78)       | 35.51 (0.94)       |
| SVM            | 81.72 (0.46)        | 3.87 (0.76)         | 66.40 (2.91)       | 5.24 (1.34)         | 7.32 (0.92)         | 73.27(0.56)        | 43.38 (1.60)       |
| DeepConv-DTI   | 89.05 (0.32)        | 68.87 (0.43)        | 80.52 (0.34)       | <u>70.21 (0.28)</u> | 74.24 (0.63)        | 90.67 (0.17)       | 80.42 (0.62)       |
| GraphDTA       | 88.92 (0.11)        | 59.42 (3.23)        | 77.53 (2.03)       | 67.51 (0.52)        | 71.24 (0.81)        | 91.41 (0.12)       | 77.61 (0.74)       |
| MolTrans       | 88.91 (0.16)        | 73.53 (0.23)        | 70.42 (0.34)       | 67.62 (0.22)        | 71.94 (0.16)        | 92.32 (0.33)       | 79.49 (0.64)       |
| HyperAttention | 89.33 (0.12)        | <u>79.63 (0.24)</u> | 68.93 (0.18)       | 70.12 (0.22)        | 74.21 (0.35)        | 93.51 (0.17)       | 81.41 (0.23)       |
| TransformerCPI | 87.01 (0.18)        | 63.12 (0.32)        | 66.93 (0.34)       | 66.2 (0.26)         | 69.12 (0.23)        | 88.81 (0.18)       | 70.81 (0.16)       |
| GraphormerDTI  | 86.54 (0.85)        | <b>85.40 (1.68)</b> | 60.63 (1.84)       | 64.03 (1.10)        | 70.87 (0.89)        | 92.58 (0.25)       | 81.95 (0.91)       |
| AIGO-DTI       | 90.68 (0.32)        | 73.65 (0.77)        | 76.77 (1.12)       | 69.46 (0.97)        | 75.17 (0.77)        | 93.06 (0.26)       | 83.91 (0.77)       |
| DLM-DTI        | 88.25 (0.25)        | 68.10 (2.15)        | 69.86 (0.90)       | 61.72 (0.78)        | 68.94 (0.87)        | 91.14 (0.39)       | 75.63 (0.41)       |
| EviDTI         | <u>91.27 (0.07)</u> | 70.77 (1.69)        | 80.90 (1.32)       | <b>70.44 (0.78)</b> | <b>75.48 (0.83)</b> | 93.57 (0.35)       | 83.03 (0.98)       |
| KnowMol        | <b>91.28(0.09)</b>  | 68.45(0.61)         | <b>82.44(1.25)</b> | 70.01(0.40)         | 74.79(0.39)         | <b>94.81(0.27)</b> | <b>84.93(0.92)</b> |

The best results are highlighted in bold, while the second-best results are underlined. Five independent replications of each method were performed ( $n = 5$ ). Data are expressed as means (std).

Table S3 | Comparison results of the model performance on Davis

| Davis          | Accuracy (std)     | Recall (std)        | Precision (std)    | MCC (std)          | F1 score (std)      | AUC (std)          | AUPR (std)         |
|----------------|--------------------|---------------------|--------------------|--------------------|---------------------|--------------------|--------------------|
| RF             | 84.48 (0.60)       | 65.01 (1.47)        | 80.70 (1.87)       | 64.12 (2.11)       | 72.01 (1.49)        | 89.64 (0.68)       | 83.04 (1.68)       |
| NB             | 67.53 (0.92)       | 61.70 (1.82)        | 47.78 (1.95)       | 45.21 (1.68)       | 53.85 (1.72)        | 70.11 (1.39)       | 58.43 (2.09)       |
| SVM            | 82.13 (0.59)       | 59.70 (1.57)        | 76.96 (2.19)       | 60.23 (1.45)       | 67.24 (1.61)        | 87.85 (0.78)       | 80.16 (1.65)       |
| DeepConv-DTI   | 86.41 (0.27)       | 72.14 (0.33)        | 77.85 (0.44)       | 64.53 (0.35)       | 74.89 (0.64)        | 91.83 (0.20)       | 83.87 (0.62)       |
| GraphDTA       | 81.72 (0.19)       | 53.01 (1.76)        | 74.33 (1.45)       | 62.42 (0.67)       | 71.83 (0.82)        | 85.92 (0.43)       | 74.31 (0.74)       |
| MolTrans       | 83.61 (0.18)       | 76.31 (0.34)        | 68.87 (0.24)       | 62.91 (0.13)       | 72.40 (0.17)        | 89.84 (0.22)       | 80.26 (0.66)       |
| HyperAttention | 86.61 (0.14)       | <u>78.01 (0.23)</u> | 75.41 (0.16)       | 67.54 (0.28)       | 74.21 (0.22)        | 92.01 (0.14)       | 83.92 (0.13)       |
| TransformerCPI | 82.22 (0.16)       | 68.82 (0.38)        | 68.81 (0.37)       | 64.21 (0.24)       | 72.41 (0.25)        | 87.72 (0.16)       | 76.71 (0.18)       |
| GraphormerDTI  | 84.81 (0.84)       | <b>83.78 (2.52)</b> | 68.43 (2.18)       | 65.22 (1.84)       | 75.28 (1.43)        | 91.24 (0.74)       | 84.31 (1.48)       |
| AIGO-DTI       | 86.19 (0.79)       | 72.55 (2.94)        | 78.01 (2.11)       | 65.72 (1.96)       | 75.12 (1.52)        | 92.01 (0.97)       | 84.81 (1.10)       |
| DLM-DTI        | 85.66 (0.47)       | 74.08 (2.50)        | 75.26 (1.92)       | 64.68 (1.27)       | 74.62 (1.03)        | 91.30 (0.35)       | 82.48 (0.86)       |
| EviDTI         | 87.40 (1.08)       | 72.93 (1.93)        | 81.17 (2.94)       | 68.40 (2.78)       | <b>76.81 (2.03)</b> | 92.10 (0.78)       | 85.07 (2.12)       |
| KnowMol        | <b>87.47(0.27)</b> | 71.01(0.67)         | <b>83.18(0.71)</b> | <b>68.53(0.68)</b> | <u>76.61(0.45)</u>  | <b>92.97(0.58)</b> | <b>86.59(1.37)</b> |

The best results are highlighted in bold, while the second-best results are underlined. Five independent replications of each method were performed ( $n = 5$ ). Data are expressed as means (std).

**Table S4 | Natural compounds screened as PRMT3 candidates**

| No. | Compounds              |
|-----|------------------------|
| 1   | Baicalin               |
| 2   | Aescin                 |
| 3   | Geniposide             |
| 4   | Icarin                 |
| 5   | Salvianolic acid B     |
| 6   | Timosaponin            |
| 7   | Psoralen               |
| 8   | Salidroside            |
| 9   | Agrimol B              |
| 10  | Hanbaicalin            |
| 11  | Parthenolide           |
| 12  | Quercetin              |
| 13  | Isoquercitroside       |
| 14  | Echinoid               |
| 15  | Senoside               |
| 16  | Imperatorin            |
| 17  | Hesperedin             |
| 18  | Geniposide B           |
| 19  | Dihydrocurcurbitacin B |
| 20  | Dihydromyricetin       |
